# Supplementary material for: Normal Graft Function After Pig-to-Human Kidney Xenotransplant
Source: PubMed Central journal article supplement (PMC10433134; doi:10.1001/jamasurg.2023.2774), 2023-08-16
Supplement: jamasurg-e232774-s001.pdf [file jamasurg-e232774-s001.pdf]

## Data Sharing Statement

Locke. Normal Graft Function After Pig-to-Human Kidney Xenotransplant. *JAMA Surg.*  
Published August 16, 2023. doi:10.1001/jamasurg.2023.2774

### Data

**Data available:** No
